# Supplementary material
Source: PubMed Central journal article supplement (PMC8215190)
Supplement: bloodBLD2020007236-suppl1.pdf [file bloodBLD2020007236-suppl1.pdf]

Supplemental Table S1. Genes included in the next generation sequencing panel used in the study.

|          |          |         |           |         |          |          |          |
|----------|----------|---------|-----------|---------|----------|----------|----------|
| ABI1     | CASP8    | ECT2L   | FSTL3     | KLF4    | NF1      | PRRX1    | STAT3    |
| ABL1     | CBFA2T3  | EGFR    | FUBP1     | KLHL6   | NF2      | PSIP1    | STAT4    |
| ABL2     | CBFB     | EIF4A2  | FUS       | KLK2    | NFE2L2   | PTCH1    | STAT5B   |
| ACKR3    | CBL      | ELF4    | GAS7      | KMT2A   | NFIB     | PTEN     | STIL     |
| ACSL3    | CBLB     | ELK4    | GATA1     | KMT2C   | NFKB2    | PTPN11   | STK11    |
| ACSL6    | CBLC     | ELL     | GATA2     | KMT2D   | NFKBIA   | PTPRC    | SUFU     |
| ADGRA2   | CCDC6    | ELN     | GATA3     | KNL1    | NIN      | RABEP1   | SUZ12    |
| AFDN     | CCNB1IP1 | EML4    | GID4      | KRAS    | NKX2-1   | RAC1     | SYK      |
| AFF1     | CCND1    | EMSY    | GMPS      | KTN1    | NONO     | RAD21    | TAF15    |
| AFF3     | CCND2    | EP300   | GNA11     | LASP1   | NOTCH1   | RAD50    | TAL1     |
| AFF4     | CCND3    | EPHA3   | GNA13     | LCK     | NOTCH2   | RAD51    | TAL2     |
| AKAP9    | CCNE1    | EPHA5   | GNAQ      | LCP1    | NPM1     | RAD51B   | TBL1XR1  |
| AKT1     | CD274    | EPHB1   | GNAS      | LGR5    | NR4A3    | RAF1     | TCEA1    |
| AKT2     | CD74     | EPS15   | GOLGA5    | LHFPL6  | NRAS     | RALGDS   | TCF12    |
| AKT3     | CD79A    | ERBB2   | GOPC      | LIFR    | NSD1     | RANBP17  | TCF3     |
| ALDH2    | CD79B    | ERBB3   | GPC3      | LMO1    | NSD2     | RAP1GDS1 | TCF7L2   |
| ALK      | CDC73    | ERBB4   | GPHN      | LMO2    | NSD3     | RARA     | TC11A    |
| AMER1    | CDH1     | ERC1    | GRIN2A    | LPP     | NT5C2    | RB1      | TERT     |
| APC      | CDH11    | ERCC1   | GSK3B     | LRIG3   | NTRK1    | RBM15    | TET1     |
| AR       | CDK12    | ERCC2   | H3F3A     | LRP1B   | NTRK2    | RECQL4   | TET2     |
| ARAF     | CDK4     | ERCC3   | H3F3B     | LYL1    | NTRK3    | REL      | TFE3     |
| ARFRP1   | CDK6     | ERCC4   | HERPUD1   | MAF     | NUMA1    | RET      | TFEB     |
| ARHGAP26 | CDK8     | ERCC5   | HEY1      | MAFB    | NUP214   | RHOH     | TFG      |
| ARHGEF12 | CDKN1B   | ERG     | HGF       | MALT1   | NUP93    | RICTOR   | TFPT     |
| ARID1A   | CDKN2A   | ESR1    | HIP1      | MAML2   | NUP98    | RM12     | TFRC     |
| ARID2    | CDKN2B   | ETV1    | HIST1H3B  | MAP2K1  | NUTM1    | RNF213   | TGFBR2   |
| ARNT     | CDKN2C   | ETV4    | HIST1H4I  | MAP2K2  | NUTM2B   | RNF43    | THRFP3   |
| ASPSCR1  | CDX2     | ETV5    | HLF       | MAP2K4  | OLIG2    | ROS1     | TLX1     |
| ASXL1    | CEBPA    | ETV6    | HMGA1     | MAP3K1  | OMD      | RPL10    | TLX3     |
| ATF1     | CHCHD7   | EWSR1   | HMGA2     | MAX     | P2RY8    | RPL22    | TMPRSS2  |
| ATIC     | CHEK1    | EXT1    | HMG2N2P46 | MCL1    | PAFAH1B2 | RPL5     | TNFAIP3  |
| ATM      | CHEK2    | EXT2    | HNF1A     | MDM2    | PAK3     | RPN1     | TNFRSF14 |
| ATP1A1   | CHIC2    | EZH2    | HNRNPA2B1 | MDM4    | PALB2    | RPTOR    | TNFRSF17 |
| ATP2B3   | CHN1     | EZR     | HOOK3     | MDS2    | PATZ1    | RUNX1    | TOP1     |
| ATR      | CIC      | FAM46C  | HOXA11    | MECOM   | PAX3     | RUNX1T1  | TP53     |
| ATRX     | CIITA    | FANCA   | HOXA13    | MED12   | PAX5     | SBDS     | TPM3     |
| AURKA    | CLP1     | FANCC   | HOXA9     | MEF2B   | PAX7     | SDC4     | TPM4     |
| AURKB    | CLTC     | FANCD2  | HOXC11    | MEN1    | PAX8     | SDHAF2   | TPR      |
| AXIN1    | CLTCL1   | FANCE   | HOXC13    | MET     | PBRM1    | SDHB     | TRAF7    |
| AXL      | CNBP     | FANCF   | HOXD11    | MITF    | PBX1     | SDHC     | TRIM26   |
| BAP1     | CNOT3    | FANCG   | HOXD13    | MRTFA   | PCM1     | SDHD     | TRIM27   |
| BARD1    | CNTRL    | FANCL   | HRAS      | MLF1    | PCSK7    | SEPT5    | TRIM33   |
| BCL10    | COL1A1   | FAS     | HSP90AA1  | MLH1    | PDCD1    | SEPTIN6  | TRIP11   |
| BCL11A   | COPB1    | FBXO11  | HSP90AB1  | MLL1    | PDCD1LG2 | SEPTIN9  | TRRAP    |
| BCL11B   | COX6C    | FBXW7   | IDH1      | MLL10   | PDE4DIP  | SET      | TSC1     |
| BCL2     | CREB1    | FCRL4   | IDH2      | MLL11   | PDGFB    | SETBP1   | TSC2     |
| BCL2L11  | CREB3L1  | FEV     | IGF1R     | MLL13   | PDGFRA   | SETD2    | TSHR     |
| BCL2L2   | CREB3L2  | FGF10   | IKBKE     | MLL16   | PDGFRB   | SF3B1    | TTL      |
| BCL3     | CREBBP   | FGF14   | IKZF1     | MN1     | PDK1     | SFPQ     | U2AF1    |
| BCL6     | CRKL     | FGF19   | IL2       | MNX1    | PER1     | SH2B3    | UBR5     |
| BCL7A    | CRLF2    | FGF23   | IL21R     | MPL     | PHF6     | SH3GL1   | USP6     |
| BCL9     | CRTC1    | FGF3    | IL6ST     | MRE11   | PHOX2B   | SLC34A2  | VEGFA    |
| BCOR     | CRTC3    | FGF4    | IL7R      | MSH2    | PICALM   | SLC45A3  | VEGFB    |
| BCORL1   | CSF1R    | FGF6    | INHBA     | MSH6    | PIK3CA   | SMAD2    | VHL      |
| BCR      | CSF3R    | FGFR1   | IRF4      | MSI2    | PIK3CG   | SMAD4    | VT11A    |
| BIRC3    | CTCF     | FGFR10P | IRS2      | MSN     | PIK3R1   | SMARCA4  | WAS      |
| BLM      | CTLA4    | FGFR2   | ITK       | MTCP1   | PIK3R2   | SMARCB1  | WDCP     |
| BMPR1A   | CTNNA1   | FGFR3   | JAK1      | MTOR    | PIM1     | SMARCE1  | WIF1     |
| BRAF     | CTNNB1   | FGFR4   | JAK2      | MUC1    | PLAG1    | SMO      | FKBP1    |
| BRCA1    | CYLD     | FH      | JAK3      | MUTYH   | PML      | SNX29    | WRN      |
| BRCA2    | CYP2D6   | FHIT    | JAZF1     | MYB     | PMS1     | SOCS1    | WT1      |
| BRD3     | DAXX     | FIP1L1  | JUN       | MYC     | PMS2     | SOX10    | WWTR1    |
| BRD4     | DDB2     | FLCN    | KAT6A     | MYCL    | POLE     | SOX2     | XPA      |
| BRIP1    | DDIT3    | FLI1    | KAT6B     | MYCN    | POT1     | SPECC1   | XPC      |
| BTG1     | DDR2     | FLT1    | KCNJ5     | MYD88   | POU2AF1  | SPEN     | XPO1     |
| BTK      | DDX10    | FLT3    | KDM5A     | MYH11   | POU5F1   | SPOP     | YWHAE    |
| BUB1B    | DDX5     | FLT4    | KDM5C     | MYH9    | PPARG    | SRC      | ZBTB16   |
| C15orf65 | DDX6     | FBNP1   | KDM6A     | NACA    | PPP2R1A  | SRGAP3   | ZMYM2    |
| CACNA1D  | DEK      | FOXA1   | KDR       | NBN     | PRCC     | SRSF2    | ZNF217   |
| CALR     | DICER1   | FOXL2   | KDSR      | NCKIPSD | PRDM1    | SRSF3    | ZNF331   |
| CAMTA1   | DNM2     | FOXO1   | KEAP1     | NCOA1   | PRDM16   | SS18     | ZNF384   |
| CANT1    | DNMT3A   | FOXO3   | KIAA1549  | NCOA2   | PRF1     | SS18L1   | ZNF521   |
| CARD11   | DOT1L    | FOXO4   | KIF5B     | NCOA4   | PRKAR1A  | SSX1     | ZNF703   |
| CARS     | EBF1     | FOXP1   | KIT       | NDRG1   | PRKDC    | STAG2    | ZRSR2    |

**Supplemental Table S2.** Mutations in 26 cases of DLBCL/HGBL with CNS or systemic/non-CNS relapse. COSMIC identifiers according to COSMIC release V91, 7th April 2020 (<https://cancer.sanger.ac.uk/cosmic/>)

| Sample | Type of recurrence | Gene            | DNA change         | Protein change | Variant type     | COSMIC ID     |
|--------|--------------------|-----------------|--------------------|----------------|------------------|---------------|
| ID_10  | CNS                | <i>ADGRA2</i>   | c.2476A>G          | p.I826V        | Missense         |               |
| ID_10  | CNS                | <i>BCL2</i>     | c.23G>A            | p.G8E          | Missense         | COSV61377264  |
| ID_10  | CNS                | <i>BCL2</i>     | c.23G>A            | p.G8E          | Missense         | COSV61377264  |
| ID_10  | CNS                | <i>CBL</i>      | c.2216C>T          | p.S739F        | Missense         | COSV50634108  |
| ID_10  | CNS                | <i>CCND3</i>    | c.869T>G           | p.I290R        | Missense         | COSV57828165  |
| ID_10  | CNS                | <i>CREBBP</i>   | c.3718T>G          | p.C1240G       | Missense         |               |
| ID_10  | CNS                | <i>IL6ST</i>    | c.1301C>G          | p.P434R        | Missense         | COSV61140205  |
| ID_10  | CNS                | <i>MTOR</i>     | c.4329+1G>A        |                | Splicing site    |               |
| ID_10  | CNS                | <i>MYC</i>      | c.230_231delinsGT  | p.S77C         | Missense         |               |
| ID_10  | CNS                | <i>RAF1</i>     | c.122G>A           | p.R41Q         | Missense         |               |
| ID_10  | CNS                | <i>TENT5C</i>   | c.112C>T           | p.R38*         | Nonsense         | COSV65616704  |
| ID_10  | CNS                | <i>TNFRSF14</i> | c.500dupC          | p.T169fs       | Frameshift indel |               |
| ID_28  | CNS                | <i>ARID1A</i>   | c.4805G>A          | p.S1602N       | Missense         |               |
| ID_28  | CNS                | <i>ARID2</i>    | c.3694A>G          | p.T1232A       | Missense         |               |
| ID_28  | CNS                | <i>ARID2</i>    | c.4268T>C          | p.L1423S       | Missense         |               |
| ID_28  | CNS                | <i>BCL9</i>     | c.1808G>A          | p.R603Q        | Missense         | COSV52342408  |
| ID_28  | CNS                | <i>BTG1</i>     | c.138_139delinsCT  | p.E46D         | Missense         | COSV55460075  |
| ID_28  | CNS                | <i>BTG1</i>     | c.251C>T           | p.A84V         | Missense         |               |
| ID_28  | CNS                | <i>BTG1</i>     | c.49G>A            | p.A17T         | Missense         |               |
| ID_28  | CNS                | <i>BTG1</i>     | c.413C>T           | p.T138I        | Missense         | COSV104372376 |
| ID_28  | CNS                | <i>BTG1</i>     | c.20_29dup10       | p.M11fs        | Frameshift indel |               |
| ID_28  | CNS                | <i>CAMTA1</i>   | c.1681A>T          | p.T561S        | Missense         |               |
| ID_28  | CNS                | <i>COL1A1</i>   | c.1882G>A          | p.A628T        | Missense         | COSV56811045  |
| ID_28  | CNS                | <i>EP300</i>    | c.1771A>G          | p.I591V        | Missense         |               |
| ID_28  | CNS                | <i>ETV6</i>     | c.33+1delG         |                | Splicing site    |               |
| ID_28  | CNS                | <i>ETV6</i>     | c.33+1G>A          |                | Splicing site    |               |
| ID_28  | CNS                | <i>FOXO1</i>    | c.445C>T           | p.P149S        | Missense         | COSV101092219 |
| ID_28  | CNS                | <i>IRF4</i>     | c.59G>A            | p.G20D         | Missense         | COSV66706041  |
| ID_28  | CNS                | <i>IRF4</i>     | c.191G>A           | p.R64H         | Missense         | COSV66705585  |
| ID_28  | CNS                | <i>IRF4</i>     | c.208C>G           | p.L70V         | Missense         | COSV66704349  |
| ID_28  | CNS                | <i>IRF4</i>     | c.53G>A            | p.S18N         | Missense         | COSV66705195  |
| ID_28  | CNS                | <i>IRF4</i>     | c.70C>T            | p.L24F         | Missense         | COSV66705084  |
| ID_28  | CNS                | <i>MCL1</i>     | c.464G>A           | p.S155N        | Missense         |               |
| ID_28  | CNS                | <i>MCL1</i>     | c.469G>A           | p.D157N        | Missense         |               |
| ID_28  | CNS                | <i>MLL1</i>     | c.1127C>T          | p.P376L        | Missense         |               |
| ID_28  | CNS                | <i>NCKIPSD</i>  | c.482A>G           | p.Y161C        | Missense         |               |
| ID_28  | CNS                | <i>NKX2-1</i>   | c.566C>T           | p.P189L        | Missense         | COSV61388583  |
| ID_28  | CNS                | <i>PDE4DIP</i>  | c.5038A>C          | p.T1680P       | Missense         |               |
| ID_28  | CNS                | <i>PIM1</i>     | c.550C>T           | p.L184F        | Missense         | COSV65164505  |
| ID_28  | CNS                | <i>PIM1</i>     | c.97C>T            | p.P33S         | Missense         | COSV65166500  |
| ID_28  | CNS                | <i>PIM1</i>     | c.149G>A           | p.G50D         | Missense         | COSV65166199  |
| ID_28  | CNS                | <i>PIM1</i>     | c.4C>T             | p.L2F          | Missense         | COSV65164509  |
| ID_28  | CNS                | <i>PIM1</i>     | c.403G>A           | p.E135K        | Missense         | COSV65164498  |
| ID_28  | CNS                | <i>PIM1</i>     | c.149G>T           | p.G50V         | Missense         |               |
| ID_28  | CNS                | <i>PIM1</i>     | c.83G>A            | p.G28D         | Missense         | COSV65164472  |
| ID_28  | CNS                | <i>PIM1</i>     | c.208G>A           | p.E70K         | Missense         | COSV65164585  |
| ID_28  | CNS                | <i>PRDM1</i>    | c.799_800delTA     | p.Y267fs       | Frameshift indel |               |
| ID_28  | CNS                | <i>PTCH1</i>    | c.2558A>G          | p.Q853R        | Missense         |               |
| ID_28  | CNS                | <i>RPL22</i>    | c.12+1G>A          |                | Splicing site    | COSV52377262  |
| ID_28  | CNS                | <i>TCL1A</i>    | c.154C>T           | p.R52C         | Missense         | COSV68085859  |
| ID_29  | CNS                | <i>AXIN1</i>    | c.299G>A           | p.S100N        | Missense         |               |
| ID_29  | CNS                | <i>BLM</i>      | c.3044C>T          | p.T1015I       | Missense         | COSV61926480  |
| ID_29  | CNS                | <i>IDH2</i>     | c.608G>A           | p.G203D        | Missense         |               |
| ID_29  | CNS                | <i>MSH2</i>     | c.1327C>A          | p.L443I        | Missense         |               |
| ID_29  | CNS                | <i>NUP214</i>   | c.1291C>T          | p.P431S        | Missense         | COSV99053497  |
| ID_29  | CNS                | <i>RNF43</i>    | c.235G>A           | p.E79K         | Missense         |               |
| ID_29  | CNS                | <i>TPR223</i>   | c.1140G>A          | p.W380*        | Nonsense         |               |
| ID_3   | CNS                | <i>FANCD2</i>   | c.2945C>T          | p.P982L        | Missense         |               |
| ID_3   | CNS                | <i>FANCF</i>    | c.91G>A            | p.V31M         | Missense         |               |
| ID_3   | CNS                | <i>HOXD11</i>   | c.446C>G           | p.A149G        | Missense         |               |
| ID_3   | CNS                | <i>LRIG3</i>    | c.302G>A           | p.R101Q        | Missense         | COSV57865811  |
| ID_3   | CNS                | <i>NF1</i>      | c.8395G>A          | p.V2799I       | Missense         |               |
| ID_3   | CNS                | <i>RANBP17</i>  | c.1670G>A          | p.R557H        | Missense         |               |
| ID_3   | CNS                | <i>SDHB</i>     | c.576_578delinsCAC | p.S193T        | Missense         |               |
| ID_3   | CNS                | <i>TRIM26</i>   | c.562A>G           | p.I188V        | Missense         |               |

|       |     |                 |                     |          |                  |               |
|-------|-----|-----------------|---------------------|----------|------------------|---------------|
| ID_3  | CNS | <i>UBR5</i>     | c.4268C>T           | p.A1423V | Missense         |               |
| ID_3  | CNS | <i>WIF1</i>     | c.487A>G            | p.T163A  | Missense         |               |
| ID_30 | CNS | <i>ACSL6</i>    | c.1430G>T           | p.C477F  | Missense         |               |
| ID_30 | CNS | <i>ATM</i>      | c.1051G>A           | p.D351N  | Missense         |               |
| ID_30 | CNS | <i>CBFA2T3</i>  | c.1304C>T           | p.A435V  | Missense         |               |
| ID_30 | CNS | <i>CD79B</i>    | c.467C>G            | p.T156R  | Missense         |               |
| ID_30 | CNS | <i>CD79B</i>    | c.596T>A            | p.L199Q  | Missense         |               |
| ID_30 | CNS | <i>EGFR</i>     | c.286G>A            | p.V96M   | Missense         |               |
| ID_30 | CNS | <i>GAS7</i>     | c.1301A>G           | p.D434G  | Missense         | COSV60443218  |
| ID_30 | CNS | <i>KDM6A</i>    | c.1751C>T           | p.T584M  | Missense         | COSV104429198 |
| ID_30 | CNS | <i>LRIG3</i>    | c.613T>A            | p.S205T  | Missense         |               |
| ID_30 | CNS | <i>LRP1B</i>    | c.2803G>A           | p.G935R  | Missense         | COSV67205521  |
| ID_30 | CNS | <i>MYD88</i>    | c.728G>A            | p.S243N  | Missense         |               |
| ID_30 | CNS | <i>NUP93</i>    | c.2350-2A>G         |          | Splicing site    |               |
| ID_30 | CNS | <i>PBRM1</i>    | c.4655A>G           | p.H1552R | Missense         |               |
| ID_30 | CNS | <i>TLX1</i>     | c.160G>A            | p.A54T   | Missense         | COSV100930063 |
| ID_30 | CNS | <i>TRRAP</i>    | c.6889G>A           | p.E2297K | Missense         |               |
| ID_31 | CNS | <i>CD79B</i>    | c.587A>C            | p.Y196S  | Missense         |               |
| ID_31 | CNS | <i>CD79B</i>    | c.560A>G            | p.K187R  | Missense         |               |
| ID_31 | CNS | <i>CDH11</i>    | c.877A>G            | p.K293E  | Missense         |               |
| ID_31 | CNS | <i>CDH11</i>    | c.853dupG           | p.E285fs | Frameshift indel |               |
| ID_31 | CNS | <i>EPHA5</i>    | c.2145A>C           | p.E715D  | Missense         |               |
| ID_31 | CNS | <i>HOXC13</i>   | c.451G>A            | p.D151N  | Missense         |               |
| ID_31 | CNS | <i>MYD88</i>    | c.794T>C            | p.L265P  | Missense         | COSV57169334  |
| ID_31 | CNS | <i>NCOA2</i>    | c.610G>A            | p.V204I  | Missense         |               |
| ID_31 | CNS | <i>NOTCH1</i>   | c.5629C>T           | p.R1877C | Missense         | COSV53052835  |
| ID_31 | CNS | <i>PAX3</i>     | c.541G>A            | p.E181K  | Missense         | COSV51338660  |
| ID_31 | CNS | <i>PAX7</i>     | c.1423G>A           | p.A475T  | Missense         |               |
| ID_31 | CNS | <i>PIM1</i>     | c.237G>C            | p.E79D   | Missense         | COSV65164484  |
| ID_31 | CNS | <i>PIM1</i>     | c.58C>G             | p.L20V   | Missense         | COSV65165051  |
| ID_31 | CNS | <i>PIM1</i>     | c.237G>C            | p.E79D   | Missense         | COSV65164484  |
| ID_31 | CNS | <i>PRDM1</i>    | c.1617_1619delinsTG | p.S542fs | Frameshift indel |               |
| ID_31 | CNS | <i>PTPRC</i>    | c.3373T>C           | p.W1125R | Missense         | COSV61418349  |
| ID_31 | CNS | <i>RUNX1</i>    | c.210G>C            | p.K70N   | Missense         |               |
| ID_31 | CNS | <i>TBL1XR1</i>  | c.1321C>T           | p.H441Y  | Missense         |               |
| ID_32 | CNS | <i>AXL</i>      | c.2356A>C           | p.S786R  | Missense         |               |
| ID_32 | CNS | <i>CEBPA</i>    | c.724G>A            | p.G242S  | Missense         | COSV57196802  |
| ID_32 | CNS | <i>DDX5</i>     | c.440_441+2delCTGT  |          | Splicing site    |               |
| ID_32 | CNS | <i>FHIT</i>     | c.137G>A            | p.R46H   | Missense         | COSV59284122  |
| ID_32 | CNS | <i>KIAA1549</i> | c.5798A>C           | p.E1933A | Missense         |               |
| ID_32 | CNS | <i>MAFB</i>     | c.273C>G            | p.N91K   | Missense         |               |
| ID_32 | CNS | <i>MET</i>      | c.820T>A            | p.F274I  | Missense         |               |
| ID_32 | CNS | <i>MKL1</i>     | c.2149C>T           | p.P717S  | Missense         |               |
| ID_32 | CNS | <i>PICALM</i>   | c.1394A>G           | p.H465R  | Missense         |               |
| ID_32 | CNS | <i>TET2</i>     | c.3035C>T           | p.P1012L | Missense         |               |
| ID_32 | CNS | <i>TP53</i>     | c.681dupT           | p.D228fs | Frameshift indel |               |
| ID_33 | CNS | <i>CARD11</i>   | c.377G>A            | p.G126D  | Missense         | COSV62717294  |
| ID_33 | CNS | <i>CARD11</i>   | c.1010G>A           | p.R337Q  | Missense         | COSV67796739  |
| ID_33 | CNS | <i>CBLB</i>     | c.2713C>T           | p.P905S  | Missense         | COSV51426495  |
| ID_33 | CNS | <i>ETV6</i>     | c.17C>T             | p.A6V    | Missense         | COSV67153958  |
| ID_33 | CNS | <i>ETV6</i>     | c.33+1G>A           |          | Splicing site    | COSV67148243  |
| ID_33 | CNS | <i>MAML2</i>    | c.982A>G            | p.N328D  | Missense         |               |
| ID_33 | CNS | <i>MUC1</i>     | c.747+1G>A          |          | Splicing site    |               |
| ID_33 | CNS | <i>MYD88</i>    | c.794T>C            | p.L265P  | Missense         | COSV57169334  |
| ID_33 | CNS | <i>PIM1</i>     | c.427C>G            | p.L143V  | Missense         | COSV65165620  |
| ID_33 | CNS | <i>PIM1</i>     | c.403G>A            | p.E135K  | Missense         | COSV65164498  |
| ID_33 | CNS | <i>RICTOR</i>   | c.5003C>T           | p.P1668L | Missense         | COSV57117235  |
| ID_33 | CNS | <i>RNF213</i>   | c.8512G>A           | p.V2838I | Missense         |               |
| ID_33 | CNS | <i>SBDS</i>     | c.695G>T            | p.G232V  | Missense         |               |
| ID_33 | CNS | <i>TBL1XR1</i>  | c.1322A>G           | p.H441R  | Missense         |               |
| ID_33 | CNS | <i>XPO1</i>     | c.1786C>T           | p.R596C  | Missense         |               |
| ID_4  | CNS | <i>BCL11A</i>   | c.353G>A            | p.R118K  | Missense         | COSV59627391  |
| ID_4  | CNS | <i>BCL2</i>     | c.314C>T            | p.S105F  | Missense         |               |
| ID_4  | CNS | <i>BTG1</i>     | c.142C>A            | p.L48M   | Missense         |               |
| ID_4  | CNS | <i>CD79B</i>    | c.586T>C            | p.Y196H  | Missense         |               |
| ID_4  | CNS | <i>DDIT3</i>    | c.470G>A            | p.R157Q  | Missense         |               |
| ID_4  | CNS | <i>DOT1L</i>    | c.3527A>G           | p.N1176S | Missense         | COSV67113692  |
| ID_4  | CNS | <i>ERCC4</i>    | c.1370A>G           | p.D457G  | Missense         |               |
| ID_4  | CNS | <i>ETV6</i>     | c.17C>T             | p.A6V    | Missense         | COSV67153958  |
| ID_4  | CNS | <i>FCRL4</i>    | c.1168G>A           | p.A390T  | Missense         | COSV54859347  |
| ID_4  | CNS | <i>FOXO1</i>    | c.1069T>G           | p.S357A  | Missense         |               |
| ID_4  | CNS | <i>FUBP1</i>    | c.2_3delinsAC       | p.M1N    | Missense         |               |
| ID_4  | CNS | <i>IL7R</i>     | c.419G>A            | p.R140Q  | Missense         | COSV100286272 |

|      |     |                  |                    |           |                  |               |
|------|-----|------------------|--------------------|-----------|------------------|---------------|
| ID_4 | CNS | <i>KLHL6</i>     | c.185T>C           | p.L62P    | Missense         |               |
| ID_4 | CNS | <i>KMT2D</i>     | c.16442G>A         | p.C5481Y  | Missense         |               |
| ID_4 | CNS | <i>MN1</i>       | c.1569_1571dupACA  | p.Q524dup | Inframe indel    |               |
| ID_4 | CNS | <i>MYD88</i>     | c.794T>C           | p.L265P   | Missense         | COSV57169334  |
| ID_4 | CNS | <i>NFE2L2</i>    | c.750T>A           | p.F250L   | Missense         |               |
| ID_4 | CNS | <i>PIM1</i>      | c.159C>G           | p.Y53*    | Nonsense         | COSV100998570 |
| ID_4 | CNS | <i>PIM1</i>      | c.64G>A            | p.A22T    | Missense         |               |
| ID_4 | CNS | <i>PIM1</i>      | c.757G>A           | p.V253I   | Missense         | COSV65166535  |
| ID_4 | CNS | <i>PIM1</i>      | c.413C>T           | p.A138V   | Missense         | COSV65164653  |
| ID_4 | CNS | <i>RNF213</i>    | c.12895G>A         | p.G4299S  | Missense         | COSV60405281  |
| ID_4 | CNS | <i>RUNX1</i>     | c.1126C>T          | p.R376C   | Missense         | COSV99038633  |
| ID_4 | CNS | <i>SPEN</i>      | c.3095A>G          | p.E1032G  | Missense         |               |
| ID_4 | CNS | <i>TERT</i>      | c.838G>A           | p.E280K   | Missense         | COSV57204773  |
| ID_4 | CNS | <i>TRIP11</i>    | c.217A>G           | p.K73E    | Missense         |               |
| ID_4 | CNS | <i>USP6</i>      | c.4045G>A          | p.E1349K  | Missense         |               |
| ID_5 | CNS | <i>AFF4</i>      | c.1579G>A          | p.A527T   | Missense         |               |
| ID_5 | CNS | <i>ALK</i>       | c.628G>A           | p.A210T   | Missense         |               |
| ID_5 | CNS | <i>ATM</i>       | c.4709T>C          | p.V1570A  | Missense         |               |
| ID_5 | CNS | <i>BRAF</i>      | c.1782T>G          | p.D594E   | Missense         | COSV56284149  |
| ID_5 | CNS | <i>BRAF</i>      | c.1782T>G          | p.D594E   | Inframe indel    | COSV56284149  |
| ID_5 | CNS | <i>BTG1</i>      | c.109_114delCTGCAG |           | Inframe indel    |               |
| ID_5 | CNS | <i>CALR</i>      | c.366G>T           | p.M122I   | Missense         |               |
| ID_5 | CNS | <i>CCND3</i>     | c.403C>G           | p.R135G   | Missense         |               |
| ID_5 | CNS | <i>CD79B</i>     | c.586T>C           | p.Y196H   | Missense         |               |
| ID_5 | CNS | <i>CDH11</i>     | c.28G>A            | p.A10T    | Missense         | COSV51770897  |
| ID_5 | CNS | <i>EP300</i>     | c.4232C>T          | p.T1411I  | Missense         |               |
| ID_5 | CNS | <i>FLT4</i>      | c.475C>G           | p.L159V   | Missense         |               |
| ID_5 | CNS | <i>KDR</i>       | c.1253A>T          | p.Y418F   | Missense         |               |
| ID_5 | CNS | <i>KLHL6</i>     | c.56G>C            | p.S19T    | Missense         |               |
| ID_5 | CNS | <i>KLHL6</i>     | c.71_74delTGGC     | p.L24fs   | Frameshift indel |               |
| ID_5 | CNS | <i>KLK2</i>      | c.500G>A           | p.R167H   | Missense         | COSV57568443  |
| ID_5 | CNS | <i>KMT2A</i>     | c.968A>C           | p.E323A   | Missense         |               |
| ID_5 | CNS | <i>MYC</i>       | c.169C>T           | p.P57S    | Missense         | COSV104388023 |
| ID_5 | CNS | <i>MYD88</i>     | c.794T>C           | p.L265P   | Missense         | COSV57169334  |
| ID_5 | CNS | <i>PIM1</i>      | c.327G>A           | p.W109*   | Nonsense         | COSV65164598  |
| ID_5 | CNS | <i>PIM1</i>      | c.290G>A           | p.S97N    | Missense         | COSV65164769  |
| ID_5 | CNS | <i>PIM1</i>      | c.189+1G>A         |           | Splicing site    | COSV65165653  |
| ID_5 | CNS | <i>PIM1</i>      | c.373C>G           | p.P125A   | Missense         | COSV65165013  |
| ID_5 | CNS | <i>PIM1</i>      | c.286G>A           | p.V96M    | Missense         | COSV65164628  |
| ID_5 | CNS | <i>PIM1</i>      | c.403G>A           | p.E135K   | Missense         | COSV65164498  |
| ID_5 | CNS | <i>PIM1</i>      | c.83G>A            | p.G28D    | Missense         | COSV65164472  |
| ID_5 | CNS | <i>PIM1</i>      | c.88G>A            | p.E30K    | Missense         | COSV65166054  |
| ID_5 | CNS | <i>PRKDC</i>     | c.4883A>T          | p.K1628M  | Missense         |               |
| ID_5 | CNS | <i>ROS1</i>      | c.1144T>C          | p.Y382H   | Missense         | COSV63863083  |
| ID_5 | CNS | <i>ROS1</i>      | c.2092G>A          | p.E698K   | Missense         |               |
| ID_5 | CNS | <i>SLC45A3</i>   | c.886G>A           | p.V296M   | Missense         |               |
| ID_5 | CNS | <i>SOCS1</i>     | c.529C>G           | p.L177V   | Missense         | COSV59658959  |
| ID_5 | CNS | <i>ZNF703</i>    | c.1531_1542del12   |           | Inframe indel    |               |
| ID_6 | CNS | <i>ABL1</i>      | c.1624A>G          | p.R542G   | Missense         |               |
| ID_6 | CNS | <i>ARHGAP26</i>  | c.2095G>A          | p.V699I   | Missense         | COSV50824137  |
| ID_6 | CNS | <i>BCL2</i>      | c.174T>A           | p.H58Q    | Missense         | COSV61372226  |
| ID_6 | CNS | <i>BCL7A</i>     | c.92+1G>A          |           | Splicing site    | COSV55850485  |
| ID_6 | CNS | <i>BCL7A</i>     | c.92+1G>T          |           | Splicing site    |               |
| ID_6 | CNS | <i>CCNB1IP1</i>  | c.772_773insT      | p.P258fs  | Frameshift indel |               |
| ID_6 | CNS | <i>CCNB1IP1</i>  | c.242G>A           | p.R81Q    | Missense         | COSV100738559 |
| ID_6 | CNS | <i>CDK12</i>     | c.1876A>G          | p.T626A   | Missense         | COSV71000603  |
| ID_6 | CNS | <i>EP300</i>     | c.757T>C           | p.Y253H   | Missense         |               |
| ID_6 | CNS | <i>ERBB3</i>     | c.2406C>G          | p.H802Q   | Missense         |               |
| ID_6 | CNS | <i>EZH2</i>      | c.1936T>A          | p.Y646N   | Missense         | COSV57445823  |
| ID_6 | CNS | <i>FCRL4</i>     | c.263G>A           | p.R88Q    | Missense         | COSV54861298  |
| ID_6 | CNS | <i>FOXO1</i>     | c.62G>T            | p.R21L    | Missense         | COSV104427937 |
| ID_6 | CNS | <i>GNA13</i>     | c.200A>G           | p.Q67R    | Missense         |               |
| ID_6 | CNS | <i>HNRNPA2B1</i> | c.264+2T>A         |           | Splicing site    |               |
| ID_6 | CNS | <i>KMT2D</i>     | c.15143G>A         | p.R5048H  | Missense         | COSV56418956  |
| ID_6 | CNS | <i>MLLT1</i>     | c.632G>A           | p.S211N   | Missense         |               |
| ID_6 | CNS | <i>MYC</i>       | c.774G>T           | p.E258D   | Missense         |               |
| ID_6 | CNS | <i>MYC</i>       | c.458T>G           | p.F153C   | Missense         | COSV52375241  |
| ID_6 | CNS | <i>MYC</i>       | c.550A>T           | p.S184C   | Missense         | COSV99422123  |
| ID_6 | CNS | <i>MYC</i>       | c.464C>T           | p.A155V   | Missense         |               |
| ID_6 | CNS | <i>MYC</i>       | c.761T>C           | p.V254A   | Missense         |               |
| ID_6 | CNS | <i>MYC</i>       | c.799T>G           | p.S267A   | Missense         |               |
| ID_6 | CNS | <i>PIM1</i>      | c.248G>A           | p.G83D    | Missense         | COSV65164544  |
| ID_6 | CNS | <i>POLE</i>      | c.1973A>C          | p.K658T   | Missense         |               |

|       |          |                 |                    |           |                  |               |
|-------|----------|-----------------|--------------------|-----------|------------------|---------------|
| ID_6  | CNS      | <i>SPEN</i>     | c.4936A>T          | p.T1646S  | Missense         |               |
| ID_6  | CNS      | <i>TNFRSF14</i> | c.552-2A>C         |           | Splicing site    | COSV63188463  |
| ID_6  | CNS      | <i>TP53</i>     | c.533A>C           | p.H178P   | Missense         | COSV52689182  |
| ID_6  | CNS      | <i>TRIM33</i>   | c.1486C>G          | p.P496A   | Missense         |               |
| ID_6  | CNS      | <i>UBR5</i>     | c.1415G>A          | p.R472Q   | Missense         | COSV99642843  |
| ID_6  | CNS      | <i>ZNF521</i>   | c.1301A>G          | p.E434G   | Missense         |               |
| ID_6  | CNS      | <i>ZNF521</i>   | c.1576T>G          | p.S526A   | Missense         | COSV64123874  |
| ID_7  | CNS      | <i>ARID2</i>    | c.3145G>A          | p.V1049I  | Missense         |               |
| ID_7  | CNS      | <i>BCL2</i>     | c.260G>A           | p.S87N    | Missense         | COSV61379900  |
| ID_7  | CNS      | <i>BUB1B</i>    | c.805A>G           | p.N269D   | Missense         |               |
| ID_7  | CNS      | <i>CBLB</i>     | c.2729C>T          | p.P910L   | Missense         |               |
| ID_7  | CNS      | <i>CREBBP</i>   | c.1996G>T          | p.E666*   | Nonsense         |               |
| ID_7  | CNS      | <i>EP300</i>    | c.5054T>G          | p.V1685G  | Missense         |               |
| ID_7  | CNS      | <i>ERCC5</i>    | c.1195G>A          | p.E399K   | Missense         | COSV63245088  |
| ID_7  | CNS      | <i>EZH2</i>     | c.1937A>C          | p.Y646S   | Missense         | COSV57446054  |
| ID_7  | CNS      | <i>GNA13</i>    | c.100delA          | p.I34fs   | Frameshift indel |               |
| ID_7  | CNS      | <i>GNA13</i>    | c.571C>A           | p.P191T   | Missense         |               |
| ID_7  | CNS      | <i>GNA13</i>    | c.201G>C           | p.Q67H    | Missense         | COSV71474738  |
| ID_7  | CNS      | <i>IGF1R</i>    | c.1097G>A          | p.R366Q   | Missense         | COSV51271636  |
| ID_7  | CNS      | <i>KMT2D</i>    | c.7609_7612delACTT | p.T2537fs | Frameshift indel |               |
| ID_7  | CNS      | <i>KTN1</i>     | c.52A>G            | p.I18V    | Missense         |               |
| ID_7  | CNS      | <i>LASP1</i>    | c.590G>A           | p.R197H   | Missense         |               |
| ID_7  | CNS      | <i>MKL1</i>     | c.25G>A            | p.A9T     | Missense         |               |
| ID_7  | CNS      | <i>NUMA1</i>    | c.2563_2565dupAAG  | p.K855dup | Inframe indel    |               |
| ID_7  | CNS      | <i>PTPRC</i>    | c.2579C>G          | p.T860R   | Missense         |               |
| ID_7  | CNS      | <i>XPA</i>      | c.700G>T           | p.V234L   | Missense         |               |
| ID_8  | CNS      | <i>ATP2B3</i>   | c.1631A>G          | p.E544G   | Missense         |               |
| ID_8  | CNS      | <i>EP300</i>    | c.1207T>A          | p.W403R   | Missense         | COSV54346271  |
| ID_8  | CNS      | <i>EP300</i>    | c.1218T>A          | p.C406*   | Nonsense         |               |
| ID_8  | CNS      | <i>HOXD13</i>   | c.491T>C           | p.V164A   | Missense         |               |
| ID_8  | CNS      | <i>MYC</i>      | c.218C>T           | p.T73I    | Missense         | COSV52367994  |
| ID_8  | CNS      | <i>MYC</i>      | c.223C>A           | p.P75T    | Missense         | COSV52375216  |
| ID_8  | CNS      | <i>MYC</i>      | c.19G>A            | p.V7M     | Missense         | COSV52367188  |
| ID_8  | CNS      | <i>MYC</i>      | c.218C>T           | p.T73I    | Missense         | COSV52367994  |
| ID_8  | CNS      | <i>MYC</i>      | c.218C>T           | p.T73I    | Missense         | COSV52367994  |
| ID_8  | CNS      | <i>PDE4DIP</i>  | c.3676C>T          | p.R1226C  | Missense         | COSV57711551  |
| ID_8  | CNS      | <i>RUNX1</i>    | c.155T>A           | p.M52K    | Missense         | COSV55868681  |
| ID_8  | CNS      | <i>TP53</i>     | c.724T>A           | p.C242S   | Missense         | COSV52677021  |
| ID_8  | CNS      | <i>TP53</i>     | c.724T>A           | p.C242S   | Missense         | COSV52677021  |
| ID_8  | CNS      | <i>TP53</i>     | c.724T>A           | p.C242S   | Missense         | COSV52677021  |
| ID_11 | Systemic | <i>AKAP9</i>    | c.10672A>G         | p.I3558V  | Missense         | COSV62352026  |
| ID_11 | Systemic | <i>BCL11B</i>   | c.1229C>T          | p.P410L   | Missense         | COSV61733191  |
| ID_11 | Systemic | <i>BCL7A</i>    | c.89A>G            | p.K30R    | Missense         |               |
| ID_11 | Systemic | <i>CD74</i>     | c.125+2T>A         |           | Splicing site    |               |
| ID_11 | Systemic | <i>EZH2</i>     | c.1936T>A          | p.Y646N   | Missense         | COSV57445823  |
| ID_11 | Systemic | <i>KLHL6</i>    | c.286T>G           | p.Y96D    | Missense         |               |
| ID_11 | Systemic | <i>LRP1B</i>    | c.13769T>C         | p.I4590T  | Missense         |               |
| ID_11 | Systemic | <i>MLLT10</i>   | c.698A>G           | p.K233R   | Missense         |               |
| ID_11 | Systemic | <i>P2RY8</i>    | c.890C>T           | p.S297F   | Missense         |               |
| ID_11 | Systemic | <i>PSIP1</i>    | c.768A>C           | p.E256D   | Missense         |               |
| ID_11 | Systemic | <i>PTEN</i>     | c.510T>A           | p.S170R   | Missense         | COSV64295950  |
| ID_11 | Systemic | <i>PTEN</i>     | c.510T>A           | p.S170R   | Missense         | COSV100909234 |
| ID_11 | Systemic | <i>TNFRSF14</i> | c.415C>T           | p.R139C   | Missense         | COSV100859035 |
| ID_12 | Systemic | <i>AKAP9</i>    | c.6386T>G          | p.L2129W  | Missense         |               |
| ID_12 | Systemic | <i>ALK</i>      | c.2557A>G          | p.T853A   | Missense         |               |
| ID_12 | Systemic | <i>ASXL1</i>    | c.1268A>G          | p.N423S   | Missense         |               |
| ID_12 | Systemic | <i>CD79B</i>    | c.587A>G           | p.Y196C   | Missense         |               |
| ID_12 | Systemic | <i>ELL</i>      | c.704C>T           | p.T235M   | Missense         | COSV53213296  |
| ID_12 | Systemic | <i>EMSY</i>     | c.3331C>T          | p.R1111C  | Missense         | COSV58259784  |
| ID_12 | Systemic | <i>ESR1</i>     | c.1301G>A          | p.R434Q   | Missense         | COSV52791763  |
| ID_12 | Systemic | <i>ETV1</i>     | c.731G>T           | p.S244I   | Missense         |               |
| ID_12 | Systemic | <i>ETV6</i>     | c.1153-1_1165del14 |           | Splicing site    |               |
| ID_12 | Systemic | <i>KEAP1</i>    | c.706G>A           | p.D236N   | Missense         | COSV50260398  |
| ID_12 | Systemic | <i>KMT2D</i>    | c.3326_3336del11   | p.A1109fs | Frameshift indel |               |
| ID_12 | Systemic | <i>KMT2D</i>    | c.14341G>T         | p.E4781*  | Nonsense         |               |
| ID_12 | Systemic | <i>MSH2</i>     | c.1489A>G          | p.I497V   | Missense         |               |
| ID_12 | Systemic | <i>MYD88</i>    | c.794T>C           | p.L265P   | Missense         | COSV57169334  |
| ID_12 | Systemic | <i>NFKBIA</i>   | c.506C>T           | p.T169I   | Missense         |               |
| ID_12 | Systemic | <i>PCM1</i>     | c.3346T>C          | p.F1116L  | Missense         |               |
| ID_12 | Systemic | <i>POLE</i>     | c.1282G>A          | p.A428T   | Missense         | COSV57679901  |
| ID_12 | Systemic | <i>RBM15</i>    | c.1825G>A          | p.E609K   | Missense         | COSV63923357  |
| ID_12 | Systemic | <i>RPTOR</i>    | c.2734G>A          | p.A912T   | Missense         |               |
| ID_12 | Systemic | <i>SETBP1</i>   | c.1483T>A          | p.S495T   | Missense         |               |

|       |          |                 |                      |            |                  |               |
|-------|----------|-----------------|----------------------|------------|------------------|---------------|
| ID_12 | Systemic | <i>STIL</i>     | c.2225G>A            | p.R742H    | Missense         |               |
| ID_12 | Systemic | <i>SYK</i>      | c.353G>A             | p.G118E    | Missense         |               |
| ID_12 | Systemic | <i>TRIP11</i>   | c.217A>G             | p.K73E     | Missense         |               |
| ID_12 | Systemic | <i>TSC2</i>     | c.5116C>T            | p.R1706C   | Missense         |               |
| ID_12 | Systemic | <i>USP6</i>     | c.1826T>G            | p.I609R    | Missense         |               |
| ID_12 | Systemic | <i>WRN</i>      | c.2937T>G            | p.I979M    | Missense         |               |
| ID_12 | Systemic | <i>WT1</i>      | c.571G>A             | p.G191S    | Missense         |               |
| ID_13 | Systemic | <i>EPHB1</i>    | c.?                  | p.I250V    | Missense         |               |
| ID_13 | Systemic | <i>KAT6A</i>    | c.?                  | p.A1504T   | Missense         |               |
| ID_13 | Systemic | <i>KMT2D</i>    | c.?                  | p.G2623E   | Missense         |               |
| ID_13 | Systemic | <i>MAP3K6</i>   | c.3373_3375del       | p.K1125del | Inframe indel    | COSV58872709  |
| ID_13 | Systemic | <i>PRDM1</i>    | c.291+1G>C           |            | Splicing site    |               |
| ID_13 | Systemic | <i>SPOP</i>     | c.224G>T             | p.G75V     | Missense         | COSV61654912  |
| ID_13 | Systemic | <i>TAF1</i>     | c.?                  | p.R1181C   | Missense         |               |
| ID_13 | Systemic | <i>TCL1A</i>    | c.113C>G             | p.T38S     | Missense         | COSV68085683  |
| ID_15 | Systemic | <i>AXIN1</i>    | c.1666C>A            | p.R556S    | Missense         | COSV99250091  |
| ID_15 | Systemic | <i>BCL2</i>     | c.20C>T              | p.T7I      | Missense         | COSV61373565  |
| ID_15 | Systemic | <i>BLM</i>      | c.559A>C             | p.K187Q    | Missense         |               |
| ID_15 | Systemic | <i>BRCA2</i>    | c.4685A>C            | p.Q1562P   | Missense         |               |
| ID_15 | Systemic | <i>CACNA1D</i>  | c.5264C>T            | p.S1755L   | Missense         | COSV55437928  |
| ID_15 | Systemic | <i>CBFA2T3</i>  | c.799C>G             | p.Q267E    | Missense         |               |
| ID_15 | Systemic | <i>CBFA2T3</i>  | c.469A>G             | p.T157A    | Missense         |               |
| ID_15 | Systemic | <i>CHEK2</i>    | c.538C>T             | p.R180C    | Missense         | COSV60418120  |
| ID_15 | Systemic | <i>CREBBP</i>   | c.4507T>A            | p.Y1503N   | Missense         | COSV52115152  |
| ID_15 | Systemic | <i>MITF</i>     | c.776G>A             | p.R259Q    | Missense         |               |
| ID_15 | Systemic | <i>MSH2</i>     | c.1690A>G            | p.T564A    | Missense         | COSV99254905  |
| ID_15 | Systemic | <i>PRKDC</i>    | c.1337T>A            | p.F446Y    | Missense         |               |
| ID_15 | Systemic | <i>RALGDS</i>   | c.2116G>A            | p.A706T    | Missense         |               |
| ID_15 | Systemic | <i>SMARCB1</i>  | c.1148C>G            | p.P383R    | Missense         |               |
| ID_15 | Systemic | <i>TFPT</i>     | c.635C>T             | p.P212L    | Missense         |               |
| ID_15 | Systemic | <i>TP53</i>     | c.658T>C             | p.Y220H    | Missense         | COSV52760651  |
| ID_16 | Systemic | <i>ARHGAP26</i> | c.2008A>G            | p.T670A    | Missense         |               |
| ID_16 | Systemic | <i>BCOR</i>     | c.4274A>G            | p.N1425S   | Missense         |               |
| ID_16 | Systemic | <i>BCOR</i>     | c.409G>A             | p.V137I    | Missense         | COSV60702169  |
| ID_16 | Systemic | <i>BTG1</i>     | c.443G>A             | p.S148N    | Missense         |               |
| ID_16 | Systemic | <i>CD79B</i>    | c.550-1G>A           |            | Splicing site    |               |
| ID_16 | Systemic | <i>COPB1</i>    | c.2682C>G            | p.N894K    | Missense         |               |
| ID_16 | Systemic | <i>ETV6</i>     | c.33+1G>A            |            | Splicing site    | COSV67148243  |
| ID_16 | Systemic | <i>GOLGA5</i>   | c.979A>G             | p.S327G    | Missense         |               |
| ID_16 | Systemic | <i>HSP90AA1</i> | c.1199_1204delAGAAGA |            | Inframe indel    |               |
| ID_16 | Systemic | <i>KMT2D</i>    | c.7078C>G            | p.P2360A   | Missense         |               |
| ID_16 | Systemic | <i>LPP</i>      | c.208C>A             | p.P70T     | Missense         |               |
| ID_16 | Systemic | <i>LRP1B</i>    | c.9554A>G            | p.N3185S   | Missense         |               |
| ID_16 | Systemic | <i>LRP1B</i>    | c.10405G>A           | p.A3469T   | Missense         |               |
| ID_17 | Systemic | <i>ATM</i>      | c.5975A>C            | p.K1992T   | Missense         | COSV53768482  |
| ID_17 | Systemic | <i>BARD1</i>    | c.1694G>A            | p.R565H    | Missense         | COSV99640229  |
| ID_17 | Systemic | <i>CACNA1D</i>  | c.3421A>G            | p.I1141V   | Missense         |               |
| ID_17 | Systemic | <i>CCND3</i>    | c.875T>A             | p.L292Q    | Missense         |               |
| ID_17 | Systemic | <i>CD74</i>     | c.211delC            | p.L71fs    | Frameshift indel |               |
| ID_17 | Systemic | <i>CREBBP</i>   | c.4444T>A            | p.Y1482N   | Missense         | COSV52124105  |
| ID_17 | Systemic | <i>CREBBP</i>   | c.3698+2T>A          |            | Splicing site    |               |
| ID_17 | Systemic | <i>FAS</i>      | c.652-1G>A           |            | Splicing site    | COSV58240493  |
| ID_17 | Systemic | <i>HOXC11</i>   | c.610_612delGAG      |            | Inframe indel    |               |
| ID_17 | Systemic | <i>NUP93</i>    | c.1671G>C            | p.E557D    | Missense         |               |
| ID_17 | Systemic | <i>PCSK7</i>    | c.1321C>T            | p.R441W    | Missense         | COSV58007222  |
| ID_17 | Systemic | <i>PCSK7</i>    | c.2072G>T            | p.R691M    | Missense         |               |
| ID_17 | Systemic | <i>POU2AF1</i>  | c.16+2T>G            |            | Splicing site    |               |
| ID_17 | Systemic | <i>PRKDC</i>    | c.871G>A             | p.V291M    | Missense         | COSV58052890  |
| ID_17 | Systemic | <i>PTPN11</i>   | c.925A>G             | p.I309V    | Missense         | COSV100692935 |
| ID_17 | Systemic | <i>RANBP17</i>  | c.1471C>T            | p.R491C    | Missense         |               |
| ID_17 | Systemic | <i>SEPTIN6</i>  | c.1108C>T            | p.R370C    | Missense         | COSV59714035  |
| ID_17 | Systemic | <i>STAT4</i>    | c.128G>A             | p.W43*     | Nonsense         |               |
| ID_17 | Systemic | <i>TRAF7</i>    | c.64_75del12         |            | Inframe indel    |               |
| ID_18 | Systemic | <i>AFF3</i>     | c.637A>C             | p.N213H    | Missense         |               |
| ID_18 | Systemic | <i>AKAP9</i>    | c.11310delA          | p.V3771fs  | Frameshift indel |               |
| ID_18 | Systemic | <i>ALK</i>      | c.1625C>A            | p.P542Q    | Missense         | COSV66588105  |
| ID_18 | Systemic | <i>APC</i>      | c.596C>T             | p.A199V    | Missense         | COSV57335627  |
| ID_18 | Systemic | <i>ARHGEF12</i> | c.3707T>A            | p.I1236N   | Missense         |               |
| ID_18 | Systemic | <i>BAP1</i>     | c.638G>A             | p.R213H    | Missense         | COSV56235828  |
| ID_18 | Systemic | <i>CACNA1D</i>  | c.5438G>C            | p.R1813P   | Missense         |               |
| ID_18 | Systemic | <i>CARD11</i>   | c.1201G>A            | p.D401N    | Missense         | COSV67796605  |
| ID_18 | Systemic | <i>CCDC6</i>    | c.847+1G>A           |            | Splicing site    |               |
| ID_18 | Systemic | <i>CNTRL</i>    | c.5707C>T            | p.R1903*   | Nonsense         |               |

|       |          |                 |                  |          |                  |               |
|-------|----------|-----------------|------------------|----------|------------------|---------------|
| ID_18 | Systemic | <i>CREB3L1</i>  | c.1524-2C>T      |          | Splicing site    |               |
| ID_18 | Systemic | <i>CREBBP</i>   | c.1270C>T        | p.R424*  | Nonsense         | COSV52142374  |
| ID_18 | Systemic | <i>ERBB2</i>    | c.1807G>A        | p.G603S  | Missense         |               |
| ID_18 | Systemic | <i>ERCC5</i>    | c.3122T>C        | p.M1041T | Missense         | COSV63244391  |
| ID_18 | Systemic | <i>ETV6</i>     | c.18_33del16     | p.Q7fs   | Frameshift indel |               |
| ID_18 | Systemic | <i>EXT2</i>     | c.1411C>T        | p.R471W  | Missense         |               |
| ID_18 | Systemic | <i>FANCA</i>    | c.3099C>A        | p.D1033E | Missense         |               |
| ID_18 | Systemic | <i>FAS</i>      | c.3G>A           | p.M1I    | Missense         | COSV58239725  |
| ID_18 | Systemic | <i>FCRL4</i>    | c.52+1G>A        |          | Splicing site    |               |
| ID_18 | Systemic | <i>FGF6</i>     | c.362C>G         | p.S121C  | Missense         |               |
| ID_18 | Systemic | <i>FGFR3</i>    | c.28C>T          | p.L10F   | Missense         |               |
| ID_18 | Systemic | <i>FHIT</i>     | c.125G>A         | p.R42Q   | Missense         |               |
| ID_18 | Systemic | <i>FOXA1</i>    | c.575C>T         | p.T192M  | Missense         | COSV51644184  |
| ID_18 | Systemic | <i>HMGA2</i>    | c.86G>A          | p.R29H   | Missense         | COSV100666657 |
| ID_18 | Systemic | <i>IDH2</i>     | c.734C>T         | p.P245L  | Missense         |               |
| ID_18 | Systemic | <i>IRS2</i>     | c.3148G>A        | p.V1050I | Missense         |               |
| ID_18 | Systemic | <i>KIAA1549</i> | c.2857G>A        | p.D953N  | Missense         |               |
| ID_18 | Systemic | <i>KMT2D</i>    | c.15143G>A       | p.R5048H | Missense         | COSV56418956  |
| ID_18 | Systemic | <i>MAFB</i>     | c.7G>A           | p.A3T    | Missense         |               |
| ID_18 | Systemic | <i>MAP3K1</i>   | c.3070A>C        | p.K1024Q | Missense         |               |
| ID_18 | Systemic | <i>MLL2</i>     | c.2515C>T        | p.L839F  | Missense         |               |
| ID_18 | Systemic | <i>MYB</i>      | c.680C>T         | p.P227L  | Missense         | COSV100214847 |
| ID_18 | Systemic | <i>NCKIPSD</i>  | c.298C>T         | p.R100W  | Missense         |               |
| ID_18 | Systemic | <i>NOTCH1</i>   | c.7535C>T        | p.P2512L | Missense         | COSV53028152  |
| ID_18 | Systemic | <i>NUP214</i>   | c.6239+1G>A      |          | Splicing site    |               |
| ID_18 | Systemic | <i>NUTM1</i>    | c.643C>T         | p.R215C  | Missense         | COSV61548336  |
| ID_18 | Systemic | <i>PDGFB</i>    | c.148G>A         | p.G50R   | Missense         | COSV58647497  |
| ID_18 | Systemic | <i>PDK1</i>     | c.145T>C         | p.Y49H   | Missense         |               |
| ID_18 | Systemic | <i>PICALM</i>   | c.525G>A         | p.M175I  | Missense         |               |
| ID_18 | Systemic | <i>PLAG1</i>    | c.688C>T         | p.R230*  | Nonsense         | COSV100387966 |
| ID_18 | Systemic | <i>PMS2</i>     | c.475G>A         | p.V159M  | Missense         | COSV99763777  |
| ID_18 | Systemic | <i>PRDM16</i>   | c.1091G>A        | p.R364Q  | Missense         |               |
| ID_18 | Systemic | <i>RNF213</i>   | c.377C>T         | p.P126L  | Missense         |               |
| ID_18 | Systemic | <i>SOCS1</i>    | c.208_237del30   |          | Inframe indel    |               |
| ID_18 | Systemic | <i>STAT5B</i>   | c.1697G>A        | p.R566Q  | Missense         | COSV53180310  |
| ID_18 | Systemic | <i>TET1</i>     | c.217C>T         | p.L73F   | Missense         |               |
| ID_18 | Systemic | <i>TET2</i>     | c.4393C>T        | p.R1465* | Nonsense         | COSV54395631  |
| ID_18 | Systemic | <i>TET2</i>     | c.5639T>C        | p.L1880P | Missense         |               |
| ID_18 | Systemic | <i>TP53</i>     | c.743G>A         | p.R248Q  | Missense         | COSV52661580  |
| ID_18 | Systemic | <i>TP53</i>     | c.743G>A         | p.R248Q  | Missense         | COSV52661580  |
| ID_18 | Systemic | <i>TP53</i>     | c.733G>A         | p.G245S  | Missense         | COSV52661877  |
| ID_18 | Systemic | <i>TRIM27</i>   | c.1304G>C        | p.R435P  | Missense         |               |
| ID_18 | Systemic | <i>TRIP11</i>   | c.4967C>T        | p.A1656V | Missense         |               |
| ID_18 | Systemic | <i>TRRAP</i>    | c.4988G>A        | p.R1663H | Missense         |               |
| ID_18 | Systemic | <i>TSHR</i>     | c.1721C>G        | p.T574S  | Missense         |               |
| ID_18 | Systemic | <i>U2AF1</i>    | c.494G>A         | p.R165Q  | Missense         |               |
| ID_19 | Systemic | <i>APC</i>      | c.5108G>C        | p.G1703A | Missense         |               |
| ID_19 | Systemic | <i>BCL3</i>     | c.244C>T         | p.L82F   | Missense         |               |
| ID_19 | Systemic | <i>BTG1</i>     | c.443G>A         | p.S148N  | Missense         |               |
| ID_19 | Systemic | <i>ERCC5</i>    | c.56C>T          | p.P19L   | Missense         | COSV99053842  |
| ID_19 | Systemic | <i>FGFR1</i>    | c.1284+4delA     |          | Inframe indel    |               |
| ID_19 | Systemic | <i>FIP1L1</i>   | c.1600_1601delAG | p.R534fs | Frameshift indel |               |
| ID_19 | Systemic | <i>MLL2</i>     | c.1945C>T        | p.P649S  | Missense         |               |
| ID_19 | Systemic | <i>MYD88</i>    | c.794T>C         | p.L265P  | Missense         | COSV57169334  |
| ID_19 | Systemic | <i>NIN</i>      | c.4648T>G        | p.S1550A | Missense         |               |
| ID_19 | Systemic | <i>PIM1</i>     | c.549G>C         | p.K183N  | Missense         | COSV100998684 |
| ID_19 | Systemic | <i>PIM1</i>     | c.241C>T         | p.P81S   | Missense         | COSV65164906  |
| ID_19 | Systemic | <i>SETD2</i>    | c.4376G>A        | p.R1459Q | Missense         |               |
| ID_19 | Systemic | <i>SH3GL1</i>   | c.901C>T         | p.R301W  | Missense         | COSV53656206  |
| ID_19 | Systemic | <i>SOCS1</i>    | c.47C>T          | p.A16V   | Missense         |               |
| ID_19 | Systemic | <i>SRGAP3</i>   | c.2663G>A        | p.R888Q  | Missense         | COSV64538081  |
| ID_19 | Systemic | <i>TBL1XR1</i>  | c.971_973delCTT  |          | Inframe indel    |               |
| ID_19 | Systemic | <i>TCF3</i>     | c.424G>A         | p.G142S  | Missense         |               |
| ID_19 | Systemic | <i>TCL1A</i>    | c.325G>T         | p.E109*  | Nonsense         |               |
| ID_19 | Systemic | <i>TNFAIP3</i>  | c.2359C>T        | p.Q787*  | Nonsense         |               |
| ID_19 | Systemic | <i>TRAF7</i>    | c.476-2A>G       |          | Splicing site    |               |
| ID_19 | Systemic | <i>XPC</i>      | c.1599G>C        | p.E533D  | Missense         |               |
| ID_21 | Systemic | <i>ADGRA2</i>   | c.2396G>A        | p.R799H  | Missense         | COSV55102467  |
| ID_21 | Systemic | <i>ATM</i>      | c.6670A>G        | p.M2224V | Missense         |               |
| ID_21 | Systemic | <i>BCL7A</i>    | c.92+1G>C        |          | Splicing site    | COSV55846678  |
| ID_21 | Systemic | <i>CACNA1D</i>  | c.6031C>T        | p.R2011W | Missense         |               |
| ID_21 | Systemic | <i>CDKN1B</i>   | c.232G>A         | p.E78K   | Missense         | COSV57431456  |
| ID_21 | Systemic | <i>CNTRL</i>    | c.5782C>G        | p.Q1928E | Missense         |               |

|       |          |                 |                     |          |                  |               |
|-------|----------|-----------------|---------------------|----------|------------------|---------------|
| ID_21 | Systemic | <i>DDR2</i>     | c.1012C>T           | p.L338F  | Missense         | COSV100906633 |
| ID_21 | Systemic | <i>DOT1L</i>    | c.1148C>G           | p.A383G  | Missense         |               |
| ID_21 | Systemic | <i>FANCA</i>    | c.2936C>T           | p.A979V  | Missense         |               |
| ID_21 | Systemic | <i>FBXW7</i>    | c.2020C>T           | p.R674W  | Missense         | COSV55906908  |
| ID_21 | Systemic | <i>FGFR4</i>    | c.2274_2282delinsAT | p.G759fs | Frameshift indel |               |
| ID_21 | Systemic | <i>FOXA1</i>    | c.448C>T            | p.R150C  | Missense         |               |
| ID_21 | Systemic | <i>HSP90AA1</i> | c.1202_1204delAGA   |          | Inframe indel    |               |
| ID_21 | Systemic | <i>IL6ST</i>    | c.721A>G            | p.K241E  | Missense         |               |
| ID_21 | Systemic | <i>MCL1</i>     | c.603G>C            | p.R201S  | Missense         |               |
| ID_21 | Systemic | <i>MEF2B</i>    | c.10A>G             | p.K4E    | Missense         | COSV50761915  |
| ID_21 | Systemic | <i>NFKB2</i>    | c.602G>A            | p.S201N  | Missense         |               |
| ID_21 | Systemic | <i>NFKB2</i>    | c.760C>A            | p.Q254K  | Missense         |               |
| ID_21 | Systemic | <i>NFKB2</i>    | c.614_626dup13      | p.K210fs | Frameshift indel |               |
| ID_21 | Systemic | <i>NFKBIA</i>   | c.205C>T            | p.Q69*   | Nonsense         | COSV53752357  |
| ID_21 | Systemic | <i>NOTCH2</i>   | c.6160A>T           | p.M2054L | Missense         |               |
| ID_21 | Systemic | <i>PAX5</i>     | c.22C>T             | p.P8S    | Missense         |               |
| ID_21 | Systemic | <i>PIM1</i>     | c.378_379delinsCG   | p.Q127E  | Missense         | COSV65164688  |
| ID_21 | Systemic | <i>PIM1</i>     | c.418C>G            | p.Q140E  | Missense         |               |
| ID_21 | Systemic | <i>PIM1</i>     | c.437G>T            | p.S146I  | Missense         |               |
| ID_21 | Systemic | <i>PIM1</i>     | c.438C>G            | p.S146R  | Missense         | COSV65164459  |
| ID_21 | Systemic | <i>PIM1</i>     | c.111G>C            | p.Q37H   | Missense         | COSV65165508  |
| ID_21 | Systemic | <i>PIM1</i>     | c.4C>T              | p.L2F    | Missense         | COSV65164509  |
| ID_21 | Systemic | <i>PIM1</i>     | c.277C>G            | p.L93V   | Missense         |               |
| ID_21 | Systemic | <i>PIM1</i>     | c.21C>G             | p.N7K    | Missense         | COSV65166667  |
| ID_21 | Systemic | <i>PIM1</i>     | c.164G>A            | p.G55D   | Missense         | COSV65166405  |
| ID_21 | Systemic | <i>PIM1</i>     | c.438C>G            | p.S146R  | Missense         | COSV65164459  |
| ID_21 | Systemic | <i>PIM1</i>     | c.396_416del21      |          | Inframe indel    |               |
| ID_21 | Systemic | <i>PRDM1</i>    | c.2233G>A           | p.V745M  | Missense         |               |
| ID_21 | Systemic | <i>RANBP17</i>  | c.3221G>A           | p.R1074H | Missense         | COSV101206419 |
| ID_21 | Systemic | <i>RECQL4</i>   | c.2662C>T           | p.Q888*  | Nonsense         |               |
| ID_21 | Systemic | <i>RICTOR</i>   | c.821+2T>A          |          | Splicing site    |               |
| ID_21 | Systemic | <i>SOCS1</i>    | c.448C>G            | p.L150V  | Missense         | COSV59660658  |
| ID_21 | Systemic | <i>SOCS1</i>    | c.592C>G            | p.P198A  | Missense         |               |
| ID_21 | Systemic | <i>SOCS1</i>    | c.323_342del20      | p.Q108fs | Frameshift indel |               |
| ID_21 | Systemic | <i>SRSF2</i>    | c.605C>T            | p.S202F  | Missense         |               |
| ID_21 | Systemic | <i>TCL1A</i>    | c.120+1G>A          |          | Splicing site    | COSV68085701  |
| ID_21 | Systemic | <i>TCL1A</i>    | c.113C>G            | p.T38S   | Missense         | COSV68085683  |
| ID_21 | Systemic | <i>TCL1A</i>    | c.93G>C             | p.Q31H   | Missense         |               |
| ID_21 | Systemic | <i>TCL1A</i>    | c.91C>T             | p.Q31*   | Nonsense         |               |
| ID_21 | Systemic | <i>TET2</i>     | c.2249_2252delTAAA  | p.I750fs | Frameshift indel |               |
| ID_21 | Systemic | <i>TOP1</i>     | c.33+1G>A           |          | Splicing site    | COSV63692924  |
| ID_22 | Systemic | <i>ABL2</i>     | c.3189A>C           | p.K1063N | Missense         |               |
| ID_22 | Systemic | <i>AFDN</i>     | c.4092_4100del9     |          | Inframe indel    |               |
| ID_22 | Systemic | <i>BCL2L2</i>   | c.17C>T             | p.S6L    | Missense         |               |
| ID_22 | Systemic | <i>BTG1</i>     | c.38G>A             | p.G13D   | Missense         |               |
| ID_22 | Systemic | <i>BTG1</i>     | c.250G>A            | p.A84T   | Missense         | COSV55459984  |
| ID_22 | Systemic | <i>BTG1</i>     | c.133C>G            | p.Q45E   | Missense         |               |
| ID_22 | Systemic | <i>CDK12</i>    | c.1469A>G           | p.H490R  | Missense         |               |
| ID_22 | Systemic | <i>CIITA</i>    | c.4C>T              | p.R2C    | Missense         | COSV60853917  |
| ID_22 | Systemic | <i>EBF1</i>     | c.1045G>A           | p.E349K  | Missense         | COSV58168973  |
| ID_22 | Systemic | <i>ERBB2</i>    | c.2228G>A           | p.G743E  | Missense         |               |
| ID_22 | Systemic | <i>ERCC2</i>    | c.749A>C            | p.N250T  | Missense         |               |
| ID_22 | Systemic | <i>GNA13</i>    | c.199C>G            | p.Q67E   | Missense         |               |
| ID_22 | Systemic | <i>GNA13</i>    | c.81G>C             | p.Q27H   | Missense         | COSV71474460  |
| ID_22 | Systemic | <i>HIP1</i>     | c.2494C>A           | p.Q832K  | Missense         |               |
| ID_22 | Systemic | <i>IGF1R</i>    | c.1388A>G           | p.E463G  | Missense         |               |
| ID_22 | Systemic | <i>ITK</i>      | c.775G>T            | p.E259*  | Nonsense         |               |
| ID_22 | Systemic | <i>JAK1</i>     | c.1954T>C           | p.Y652H  | Missense         | COSV61093632  |
| ID_22 | Systemic | <i>KNL1</i>     | c.2893A>T           | p.M965L  | Missense         |               |
| ID_22 | Systemic | <i>MYH9</i>     | c.944A>G            | p.D315G  | Missense         |               |
| ID_22 | Systemic | <i>NFKBIA</i>   | c.123G>C            | p.E41D   | Missense         |               |
| ID_22 | Systemic | <i>NPM1</i>     | c.503A>G            | p.D168G  | Missense         |               |
| ID_22 | Systemic | <i>PDGFRB</i>   | c.2326G>A           | p.D776N  | Missense         | COSV55800810  |
| ID_22 | Systemic | <i>PRDM16</i>   | c.2747C>T           | p.A916V  | Missense         |               |
| ID_22 | Systemic | <i>RECQL4</i>   | c.1472G>A           | p.R491Q  | Missense         |               |
| ID_22 | Systemic | <i>RPTOR</i>    | c.404C>T            | p.T135M  | Missense         |               |
| ID_22 | Systemic | <i>SOCS1</i>    | c.37G>A             | p.V13I   | Missense         |               |
| ID_22 | Systemic | <i>SOCS1</i>    | c.4_22del19         | p.V2fs   | Frameshift indel |               |
| ID_22 | Systemic | <i>SOCS1</i>    | c.528G>C            | p.E176D  | Missense         | COSV59660643  |
| ID_22 | Systemic | <i>SOCS1</i>    | c.310C>G            | p.R104G  | Missense         |               |
| ID_22 | Systemic | <i>SOCS1</i>    | c.401G>C            | p.R134P  | Missense         |               |
| ID_22 | Systemic | <i>SOCS1</i>    | c.258_279delinsC    |          | Inframe indel    |               |
| ID_22 | Systemic | <i>SOCS1</i>    | c.296G>A            | p.G99D   | Missense         | COSV59659589  |



|       |          |                 |                   |          |                  |              |
|-------|----------|-----------------|-------------------|----------|------------------|--------------|
| ID_22 | Systemic | <i>SOCS1</i>    | c.26C>T           | p.A9V    | Missense         | COSV59659508 |
| ID_22 | Systemic | <i>STAT3</i>    | c.792A>C          | p.E264D  | Missense         |              |
| ID_22 | Systemic | <i>TRIP11</i>   | c.4050A>C         | p.E1350D | Missense         |              |
| ID_22 | Systemic | <i>WISP3</i>    | c.302G>A          | p.G101E  | Missense         |              |
| ID_22 | Systemic | <i>XPO1</i>     | c.1711G>A         | p.E571K  | Missense         | COSV68944533 |
| ID_22 | Systemic | <i>XPO1</i>     | c.1711G>A         | p.E571K  | Missense         | COSV68944533 |
| ID_22 | Systemic | <i>ZNF521</i>   | c.2048T>G         | p.V683G  | Missense         |              |
| ID_23 | Systemic | <i>BCL10</i>    | c.622C>T          | p.Q208*  | Nonsense         |              |
| ID_23 | Systemic | <i>ERBB3</i>    | c.1540C>A         | p.P514T  | Missense         |              |
| ID_23 | Systemic | <i>ERBB3</i>    | c.1541C>T         | p.P514L  | Missense         |              |
| ID_23 | Systemic | <i>ERBB3</i>    | c.1543G>A         | p.G515S  | Missense         |              |
| ID_23 | Systemic | <i>ERCC5</i>    | c.1789G>C         | p.V597L  | Missense         |              |
| ID_23 | Systemic | <i>ETV5</i>     | c.455C>A          | p.P152Q  | Missense         |              |
| ID_23 | Systemic | <i>KDM5C</i>    | c.3778G>T         | p.A1260S | Missense         |              |
| ID_23 | Systemic | <i>KMT2A</i>    | c.9391C>T         | p.L3131F | Missense         |              |
| ID_23 | Systemic | <i>MED12</i>    | c.91C>G           | p.Q31E   | Missense         | COSV61332231 |
| ID_23 | Systemic | <i>PRCC</i>     | c.1022A>G         | p.D341G  | Missense         |              |
| ID_23 | Systemic | <i>PRKDC</i>    | c.9292A>G         | p.R3098G | Missense         |              |
| ID_23 | Systemic | <i>RNF213</i>   | c.12401T>C        | p.I4134T | Missense         |              |
| ID_23 | Systemic | <i>RPN1</i>     | c.430A>G          | p.T144A  | Missense         | COSV56189057 |
| ID_23 | Systemic | <i>TET2</i>     | c.5353A>T         | p.K1785* | Nonsense         | COSV99480660 |
| ID_23 | Systemic | <i>TP53</i>     | c.818G>A          | p.R273H  | Missense         | COSV52660980 |
| ID_25 | Systemic | <i>APC</i>      | c.8389A>G         | p.S2797G | Missense         |              |
| ID_25 | Systemic | <i>CARD11</i>   | c.335C>T          | p.T112I  | Missense         | COSV62718395 |
| ID_25 | Systemic | <i>CD79B</i>    | c.587A>C          | p.Y196S  | Missense         |              |
| ID_25 | Systemic | <i>CHEK1</i>    | c.545_549delGAGAA | p.R182fs | Frameshift indel |              |
| ID_25 | Systemic | <i>CIITA</i>    | c.3149+2T>C       |          | Splicing site    |              |
| ID_25 | Systemic | <i>CYP2D6</i>   | c.19G>A           | p.V7M    | Missense         | COSV99053720 |
| ID_25 | Systemic | <i>ETV6</i>     | c.33+1G>C         |          | Splicing site    |              |
| ID_25 | Systemic | <i>EZR</i>      | c.1445G>A         | p.S482N  | Missense         |              |
| ID_25 | Systemic | <i>MYD88</i>    | c.794T>C          | p.L265P  | Missense         | COSV57169334 |
| ID_25 | Systemic | <i>MYH9</i>     | c.139_141delAAG   |          | Inframe indel    |              |
| ID_25 | Systemic | <i>PIM1</i>     | c.83G>A           | p.G28D   | Missense         | COSV65164472 |
| ID_25 | Systemic | <i>PIM1</i>     | c.111G>C          | p.Q37H   | Missense         | COSV65165508 |
| ID_25 | Systemic | <i>PIM1</i>     | c.117G>C          | p.Q39H   | Missense         |              |
| ID_25 | Systemic | <i>PIM1</i>     | c.28G>A           | p.A10T   | Missense         | COSV65166493 |
| ID_25 | Systemic | <i>PIM1</i>     | c.376_410del35    | p.V126fs | Frameshift indel |              |
| ID_25 | Systemic | <i>SRGAP3</i>   | c.2734C>T         | p.R912W  | Missense         | COSV64532576 |
| ID_35 | Systemic | <i>ADGRA2</i>   | c.?               | p.D1313V | Missense         |              |
| ID_35 | Systemic | <i>BCL2</i>     | c.?               | p.R6K    | Missense         |              |
| ID_35 | Systemic | <i>BTLA</i>     | c.?               | p.K93*   | Nonsense         |              |
| ID_35 | Systemic | <i>CREBBP</i>   | c.4424C>T         | p.P1475L | Missense         | COSV52119252 |
| ID_35 | Systemic | <i>EZH2</i>     | c.1936T>C         | p.Y646H  | Missense         | COSV57445793 |
| ID_35 | Systemic | <i>FGFR3</i>    | c.2334delC        | p.779fs  | Frameshift indel |              |
| ID_35 | Systemic | <i>H1-4</i>     | c.352C>T          | p.P118S  | Missense         | COSV56803426 |
| ID_35 | Systemic | <i>KMT2D</i>    | c.829C>T          | p.Q277*  | Nonsense         |              |
| ID_35 | Systemic | <i>KMT2D</i>    | c.2161G>T         | p.E721*  | Nonsense         |              |
| ID_35 | Systemic | <i>MEF2B</i>    | c.?               | p.Y57C   | Missense         |              |
| ID_35 | Systemic | <i>PCLO</i>     | c.?               | p.E3219A | Missense         |              |
| ID_35 | Systemic | <i>PIM1</i>     | c.?               | p.R105N  | Missense         |              |
| ID_35 | Systemic | <i>RAD21</i>    | c.?               | p.T336I  | Missense         |              |
| ID_35 | Systemic | <i>SDHA</i>     | c.?               | p.G206E  | Missense         |              |
| ID_35 | Systemic | <i>SPOP</i>     | c.?               | p.T25A   | Missense         |              |
| ID_35 | Systemic | <i>TNFRSF14</i> | c.?               | p.E46G   | Missense         |              |

**Supplemental Fig. S1.** Performance characteristics of the LymphGen classifier<sup>1</sup> in 3 datasets: **(A)** the current study ( $N=26$ ), **(B)** Dana-Farber Cancer Institute reference dataset;<sup>2</sup> **(C)** Reddy et al. validation dataset.<sup>3</sup> Predictions for the second reference dataset (British Columbia Cancer Agency) were published and were not re-estimated.<sup>1,4</sup> Note that the A53 subtype was not predicted directly in (A) and (B) as it is excluded from LymphGen prediction in the absence of full copy number alteration data; furthermore, the N1 subtype was not predicted in (C) as *NOTCH1* mutations were not recorded. Datasets for (B) and (C) were obtained from cBioPortal (<https://www.cbioportal.org/>).<sup>5</sup>

The probabilistic LymphGen algorithm (<https://lmpp.nih.gov/lymphgen/>) uses data on single nucleotide variants, insertions/deletions, *BCL2* and *BCL6* rearrangements, and copy number alterations (ideally obtained from a complete exome and copy number analysis) to generate prediction for 6 molecular subsets of DLBCL termed MCD (*MYD88*<sup>L265P</sup>, *CD79B*), EZB (*EZH2*, *BCL2*), ST2 (*SGK1*, *TET2*), BN2 (*NOTCH2*, *BCL6* rearrangement), N1 (*NOTCH1*) and A53 (aneuploid, *TP53*).<sup>1</sup> Based on the number of genomic features present in the sample, the algorithm generates a “confidence” level for each subtype (between 0 and 1), and assigns the most likely subtype. The plots demonstrate distribution of confidence value for each subtype, according to subtype ultimately assigned (highlighted in orange). Mean values of the confidence levels in each category are listed above the plot.

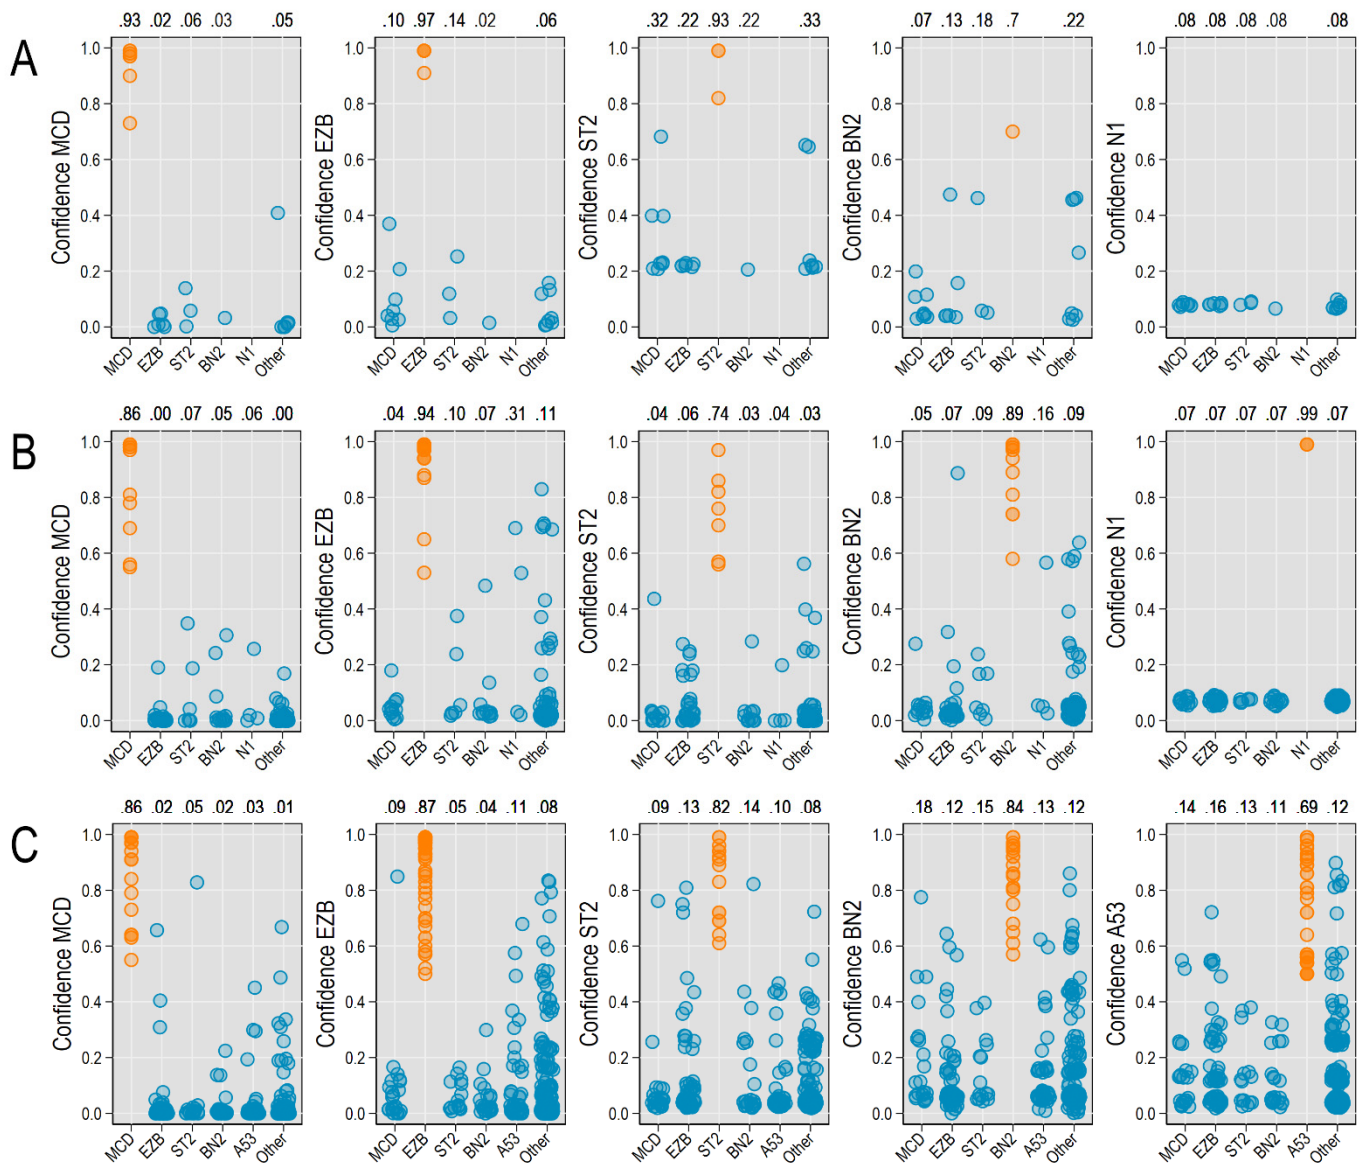

**Supplemental Fig. S2.** Analysis of the validation dataset from the study by Reddy et al.<sup>3</sup> (data obtained from cBioPortal (<https://www.cbioportal.org/>)).<sup>5</sup> A subset of samples from this study ( $N=402$ ) had a designation of CNS recurrence or no CNS recurrence. We submitted mutation and copy number alteration (CNA) data for LymphGen prediction, and assigned the simplified hierarchical classifier (hc), as described in the main paper. **(A)** Smile plot showing association between mutations in specific single genes and the odds of CNS recurrence; genes with  $P < .05$  are highlighted, but no gene retained statistical significance upon adjustment for false discovery rate (FDR) using Benjamini-Hochberg procedure;<sup>6</sup> **(B)** smile plot showing association between  $\log_2$ CNA values for specific genes (odds ratio  $< .5$  generally correspond to deletions and  $> 2$  amplifications) and the odds of CNS recurrence; *CDKN2A* deletion and *BTG1* or *POU2F2* gains were significantly associated with CNS recurrence even after FDR adjustment; **(C)** prevalence of specific LymphGen subtypes in the group with CNS and non-CNS recurrence; only the MCD subtype was significantly associated with CNS recurrence ( $P = .009$ ); **(D)** prevalence of DLBCL subtypes defined by the hierarchical classifier (hc); the hc-MCD subtype was significantly associated with CNS recurrence ( $P = .023$ ) and was assigned to 29% of tumors in the CNS recurrence group.

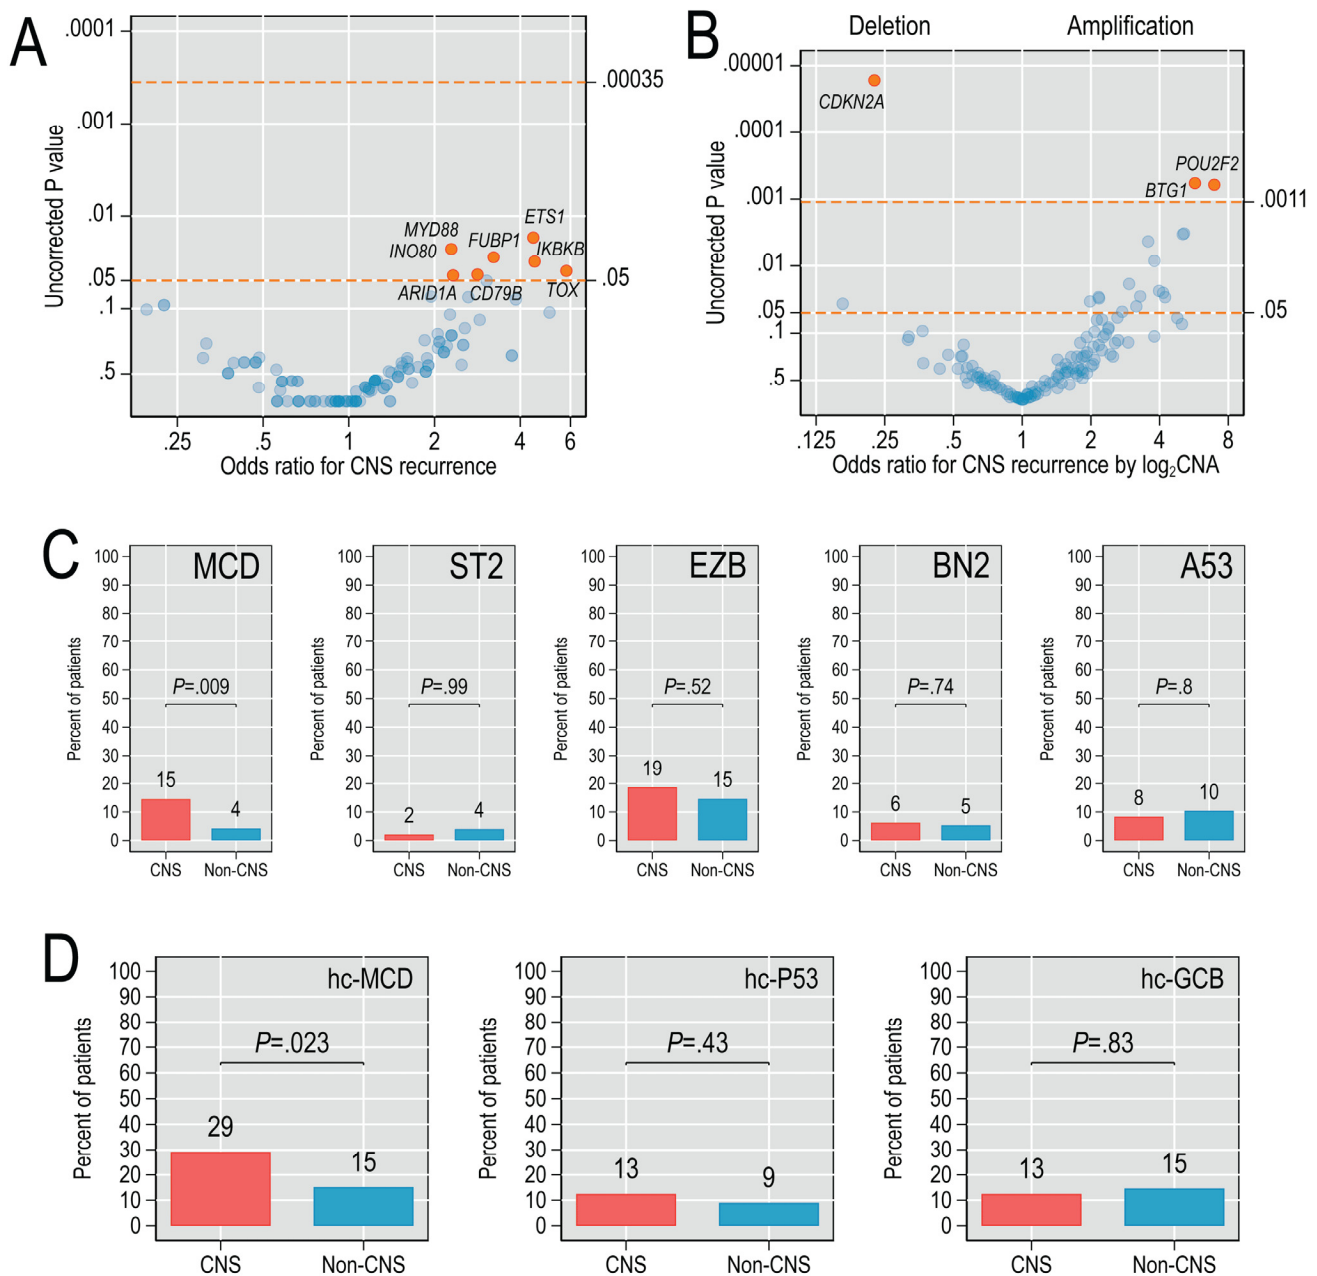

**Supplemental Fig. S3. (A)** Genomic subtypes of patients with CNS relapse in the phase 3 DLBCL GOYA trial.<sup>7,8</sup> **(B)** Performance characteristics of the LymphGen classifier<sup>1</sup> in the GOYA dataset.

Among 1,418 enrolled patients, 38 experienced a CNS relapse, and 12 had available mutational profiles obtained by next-generation sequencing of 465 cancer-related genes (Foundation Medicine, Cambridge, MA). NGS data on non-CNS cases were not available. Among patients with CNS relapse, 61% had extranodal involvement, 47% had high CNS-IPI, and none had *MYC* rearrangement (and thus double-hit status), and only one had a *BCL6* rearrangement.<sup>7</sup> Among the 12 patients with CNS relapse and available NGS data, 5 (42%) had *MYD88* mutations, and none had *TP53* a mutation. We used the publicly available gene list for FoundationOne Heme® test as input for the LymphGen algorithm.<sup>1,9</sup>

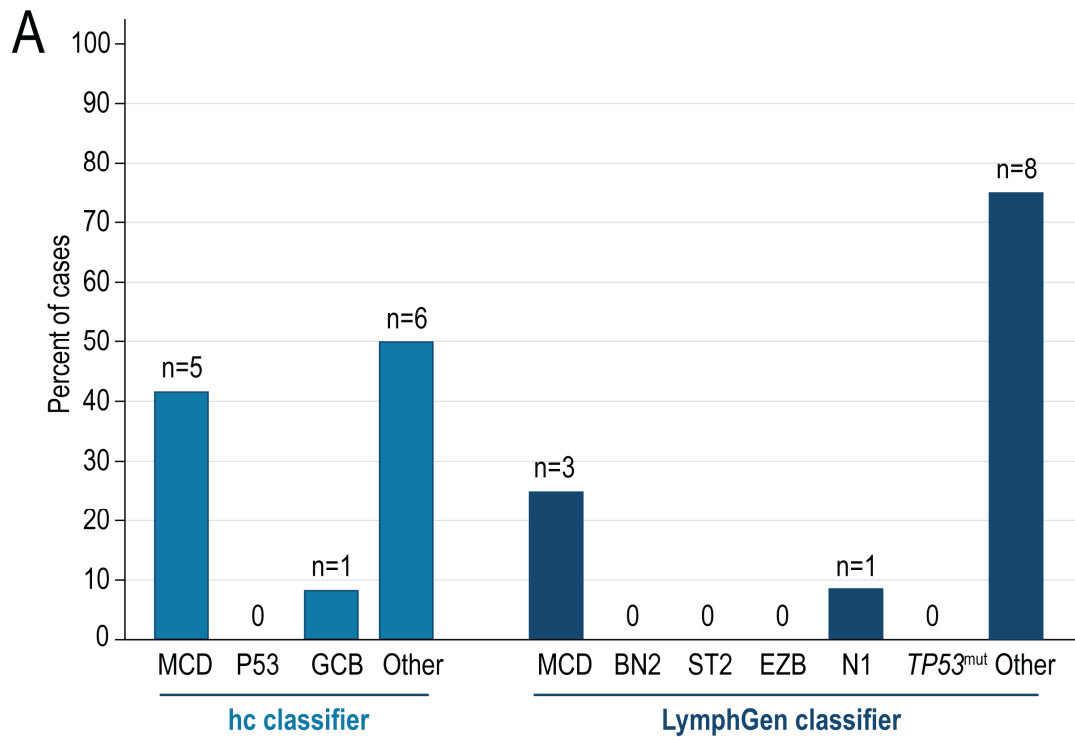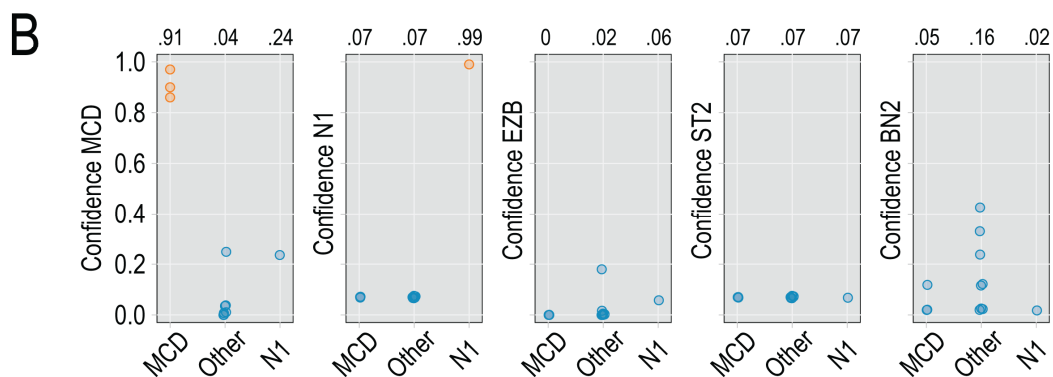

## References

1. Wright GW, Huang DW, Phelan JD, et al. A Probabilistic Classification Tool for Genetic Subtypes of Diffuse Large B Cell Lymphoma with Therapeutic Implications. *Cancer Cell*. 2020;37(4):551-568 e514.
2. Chapuy B, Stewart C, Dunford AJ, et al. Molecular subtypes of diffuse large B cell lymphoma are associated with distinct pathogenic mechanisms and outcomes. *Nat Med*. 2018;24(5):679-690.
3. Reddy A, Zhang J, Davis NS, et al. Genetic and Functional Drivers of Diffuse Large B Cell Lymphoma. *Cell*. 2017;171(2):481-494 e415.
4. Ennishi D, Jiang A, Boyle M, et al. Double-Hit Gene Expression Signature Defines a Distinct Subgroup of Germinal Center B-Cell-Like Diffuse Large B-Cell Lymphoma. *J Clin Oncol*. 2019;37(3):190-201.
5. Gao J, Aksoy BA, Dogrusoz U, et al. Integrative analysis of complex cancer genomics and clinical profiles using the cBioPortal. *Sci Signal*. 2013;6(269):pl1.
6. Benjamini Y, Hochberg Y. Controlling the False Discovery Rate: A Practical and Powerful Approach to Multiple Testing. *Journal of the Royal Statistical Society: Series B (Methodological)*. 1995;57(1):289-300.
7. Klanova M, Sehn LH, Bence-Bruckler I, et al. Integration of cell of origin into the clinical CNS International Prognostic Index improves CNS relapse prediction in DLBCL. *Blood*. 2019;133(9):919-926.
8. Bolen CR, Klanova M, Trneny M, et al. Prognostic impact of somatic mutations in diffuse large B-cell lymphoma and relationship to cell-of-origin: data from the phase III GOYA study. *Haematologica*. 2019.
9. Foundation Medicine, Cambridge, MA. FoundationOne@Heme Technical Information. (Accessed on July 24, 2020). [https://www.foundationmedicineasia.com/content/dam/rfm/apac\\_v2-en/FoundationOne\\_Heme\\_Technical\\_Information.pdf](https://www.foundationmedicineasia.com/content/dam/rfm/apac_v2-en/FoundationOne_Heme_Technical_Information.pdf)
